# Supplementary material for: Comparative analysis of adenovirus, mRNA, and protein vaccines reveals context-dependent immunogenicity and efficacy
Source: JCI journal article supplement (doi:10.1172/jci.insight.198069), 2025-11-09
Supplement: sd1 [file 1]

**Comparative analysis of adenovirus, mRNA, and protein vaccines reveals context-dependent immunogenicity and efficacy**

Bakare Awakoaiye<sup>1</sup>, Shiyi Li<sup>1</sup>, Sarah Sanchez<sup>1</sup>, Tanushree Dangi<sup>1</sup>, Nahid Irani<sup>1</sup>, Laura Arroyo<sup>1</sup>, Gabriel Arellano<sup>1</sup>, Shadi Mohammadabadi<sup>2</sup>, Malika Aid<sup>2</sup>, Pablo Penaloza-MacMaster<sup>\*1, 2</sup>

<sup>1</sup>Department of Microbiology-Immunology, Feinberg School of Medicine, Northwestern University, Chicago, IL 60611, USA. <sup>2</sup>Center for Virology and Vaccine Research, Beth Israel Deaconess Medical Center, Harvard Medical School, Boston, MA 02115, USA.

**\*Correspondence:** Pablo Penaloza-MacMaster ([ppenaloz@bidmc.harvard.edu](mailto:ppenaloz@bidmc.harvard.edu))

Figure S1

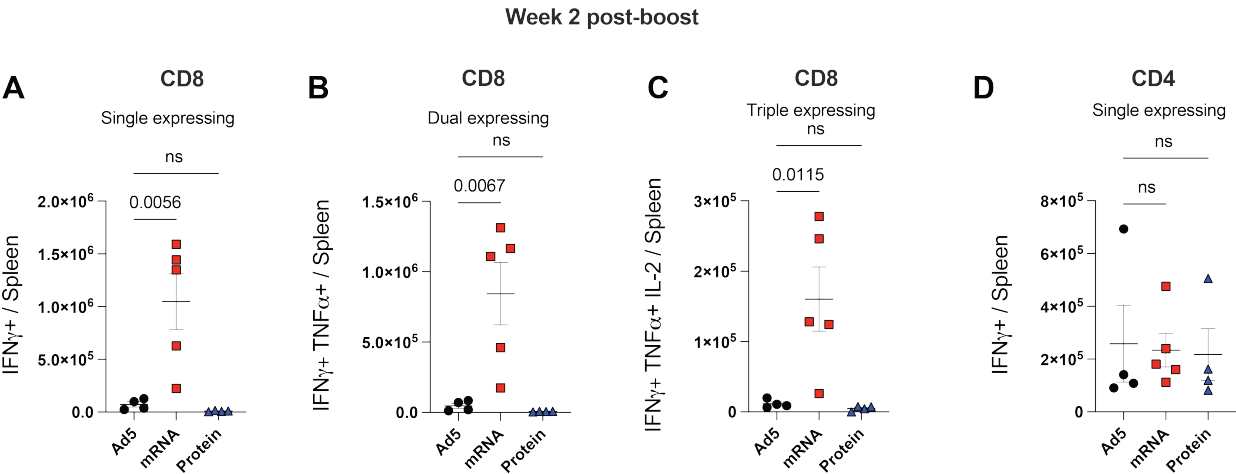

**Supplemental Figure 1. Cytokine expression by virus-specific T cells following immunization with Ad5, mRNA, and protein vaccines.** Experimental outline was similar to that in Figure 6A. Numbers of spike-specific CD8 T cells that express IFN- $\gamma$  (**A**); IFN- $\gamma$  and TNF- $\alpha$  (**B**); and IFN- $\gamma$ , TNF- IL-2 (**C**) in spleen at week 2 post-boost. (**D**) Numbers of spike-specific CD4 T cells that express IFN- $\gamma$  in spleen at week 2 post-boost. Spike peptide pool stimulations were performed for 5 h. Data from one experiment (n=5 mice per group). Experiment was repeated once with similar results. Indicated *P* values were calculated by ordinary one-way ANOVA with Dunnett's multiple comparisons. Error bars represent SEM.

Figure S2

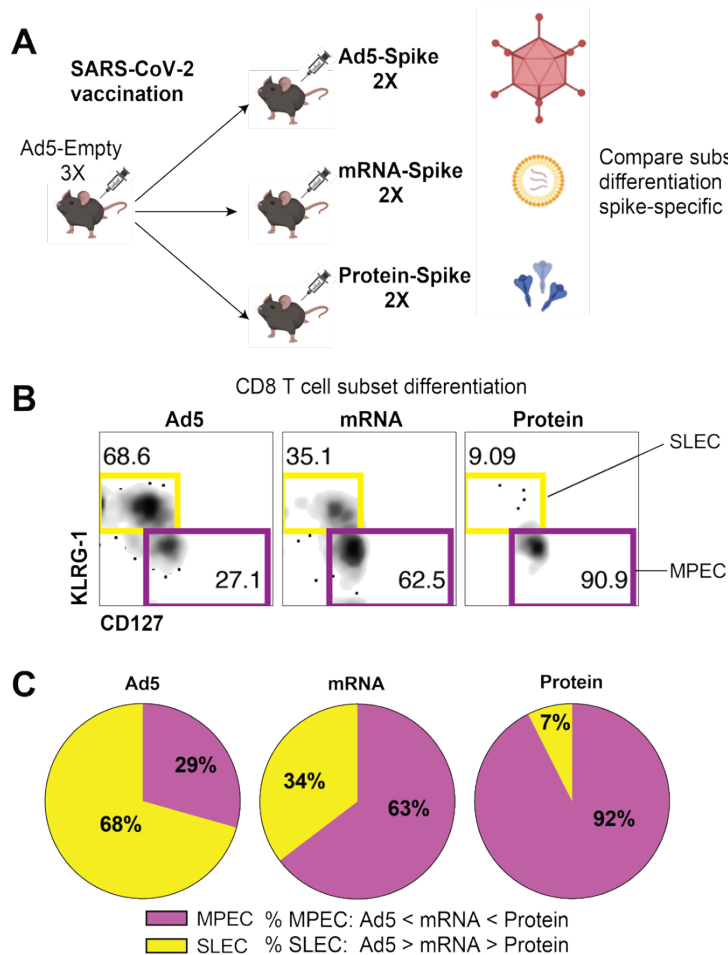

410 Supplemental Figure 2.

411 Comparative analyses of

412 CD8 T cell subset

413 differentiation. (A)

414 Experimental outline was

415 similar to that in Figure 6A. (B)

416 Representative FACS plots of

417 short-lived effector cells

418 (SLECs) and memory

419 precursor effector cells

420 (MPECs) populations, gated on

421 SARS-CoV-2-specific ( $K^b$

422 VL8+) CD8 T cells (C) Pie

423 diagrams showing CD8 T cell

424 subsets. Data from one experiment (n=4-5 mice per group). Experiment was repeated once with

425 similar results.

Figure S3

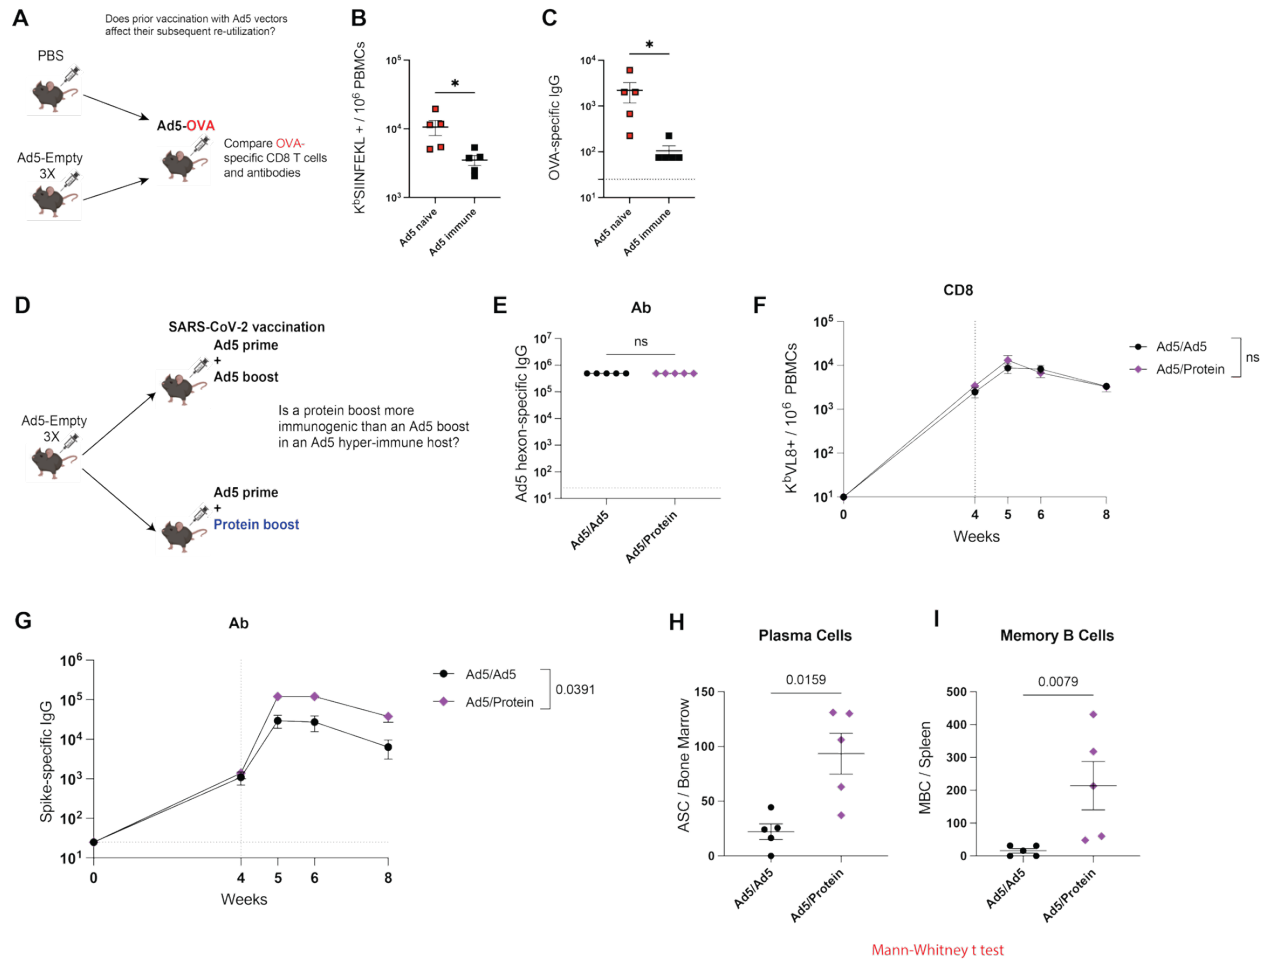

**Supplemental Figure 3. Prior immunization with Ad5 renders Ad5 vectors less immunogenic.** (A) Experimental outline for comparing Ad5 vaccine-elicited responses in mice that had been previously immunized with Ad5 vectors. First, Ad5 seropositivity was induced by injecting C57BL/6 mice with Ad5-Empty, injected intramuscularly, once every 3 weeks for a total of three doses. Control mice were injected with PBS. Mice were then immunized with Ad5-OVA and immune responses were measured at week 2 post-immunization. (B) Summary of OVA-specific ( $K^b$  SIINFEKL+) CD8<sup>+</sup> T cells in PBMCs. (C) Summary of OVA-specific antibody titers in sera. (D) Experimental outline for determining whether a heterologous Ad5/protein regimen elicits superior immune responses, relative to a homologous Ad5/Ad5 regimen. (E) Summary of

436 Ad5 hexon-specific antibody responses in sera. **(F)** Summary of spike-specific CD8 T cells in  
437 PBMCs. **(G)** Summary of spike-specific antibody responses in sera. **(H)** Spike-specific plasma  
438 cell responses in bone marrow. **(I)** Spike-specific memory B cell responses in spleen. Data from  
439 one experiment (n=5 mice per group). Experiment was repeated once with similar results. In panels  
440 B,C, E, and F indicated *P* values were calculated by Mann-Whitney t test (p value from panel F is  
441 from week 8). In panel G, indicated *P* value was calculated by Welch's t test. Error bars represent  
442 SEM.

443

Figure S4

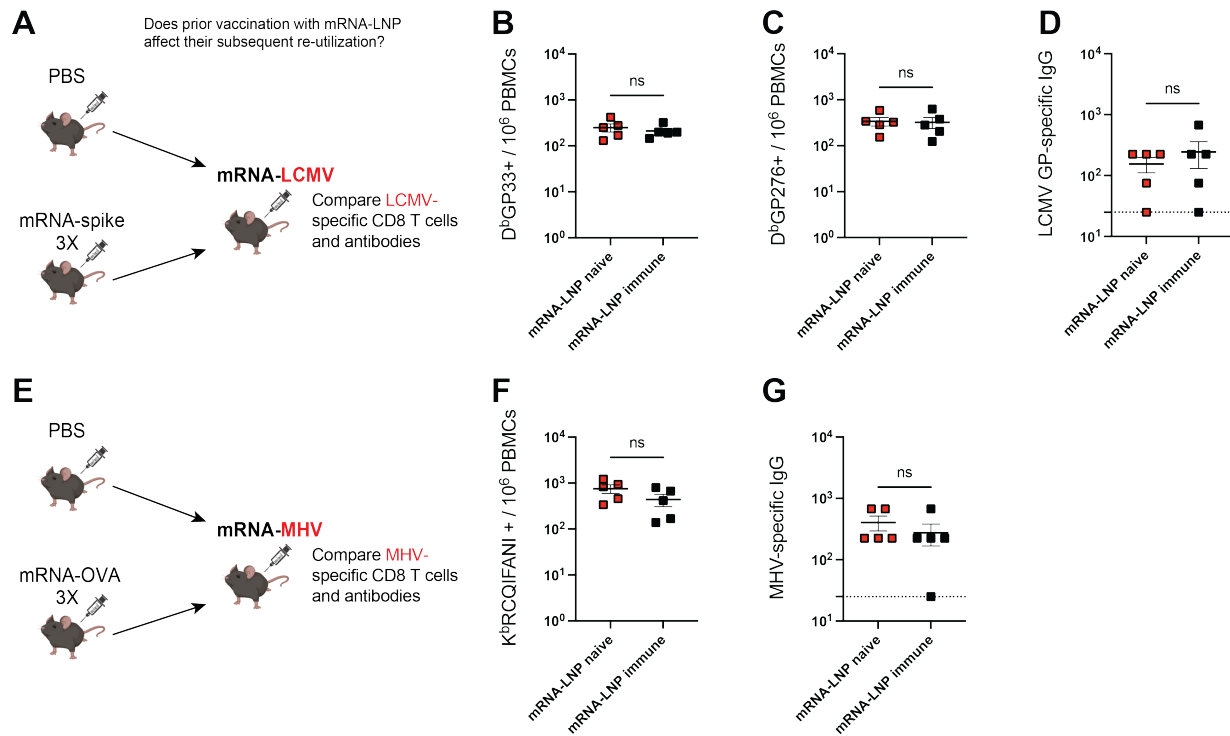

**Supplemental Figure 4. Prior immunization with mRNA vaccines does not impair their subsequent re-utilization.** (A) Experimental outline for comparing mRNA vaccine-elicited responses in mice that had been previously immunized with mRNA-spike vaccines. (B) Summary of LCMV GP33-specific CD8<sup>+</sup> T cell responses in PBMCs. (C) Summary of LCMV GP276-specific CD8<sup>+</sup> T cell responses in PBMCs. (D) Summary of LCMV GP-specific antibody responses in sera. (E) Experimental outline for comparing mRNA vaccine-elicited responses in mice that had been previously immunized with mRNA-OVA vaccines. (F) Summary of MHV-specific CD8<sup>+</sup> T cell responses ( $K^bRCQIFANI+$ ) in PBMCs. (G) Summary of MHV-specific antibody responses in sera. Data from panels B, C, D, F, and G are from week 2 post-immunization. Data from one experiment (n=5 mice per group). Indicated *P* values were determined by Mann-Whitney *t* test. Error bars represent SEM.

Figure S5

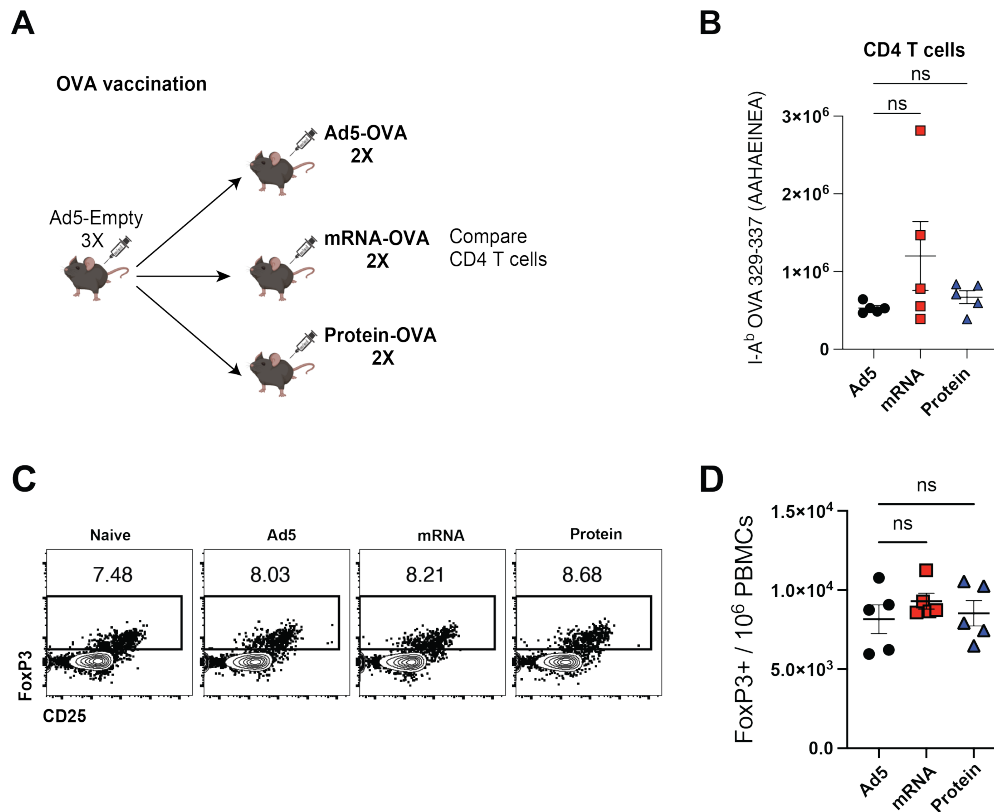

**Supplemental Figure 5. Similar CD4 T cell responses among different vaccine platforms. (A)** Experimental outline similar to Fig. 7A. **(B)** Summary of OVA-II-specific (I-A<sup>b</sup> AAHAEINEA+) CD4<sup>+</sup> T cells in the spleen at week 8. **(C)** Representative FACS plots showing FoxP3+ CD4+ T regulatory cells in PBMCs at week 2. **(D)** Summary of Treg responses in PBMCs at week 2. Data from one experiment (n=5 mice per group). Experiment was repeated once with similar results. Indicated *P* values were calculated by ordinary one-way ANOVA with Dunnett's multiple comparisons. Error bars represent SEM.
